# Supplementary material for: Health-related quality of life and influencing factors of patients with paroxysmal nocturnal hemoglobinuria in China
Source: PubMed Central journal article supplement (PMC11067208; doi:10.1186/s13023-024-03178-x), 2024-05-03

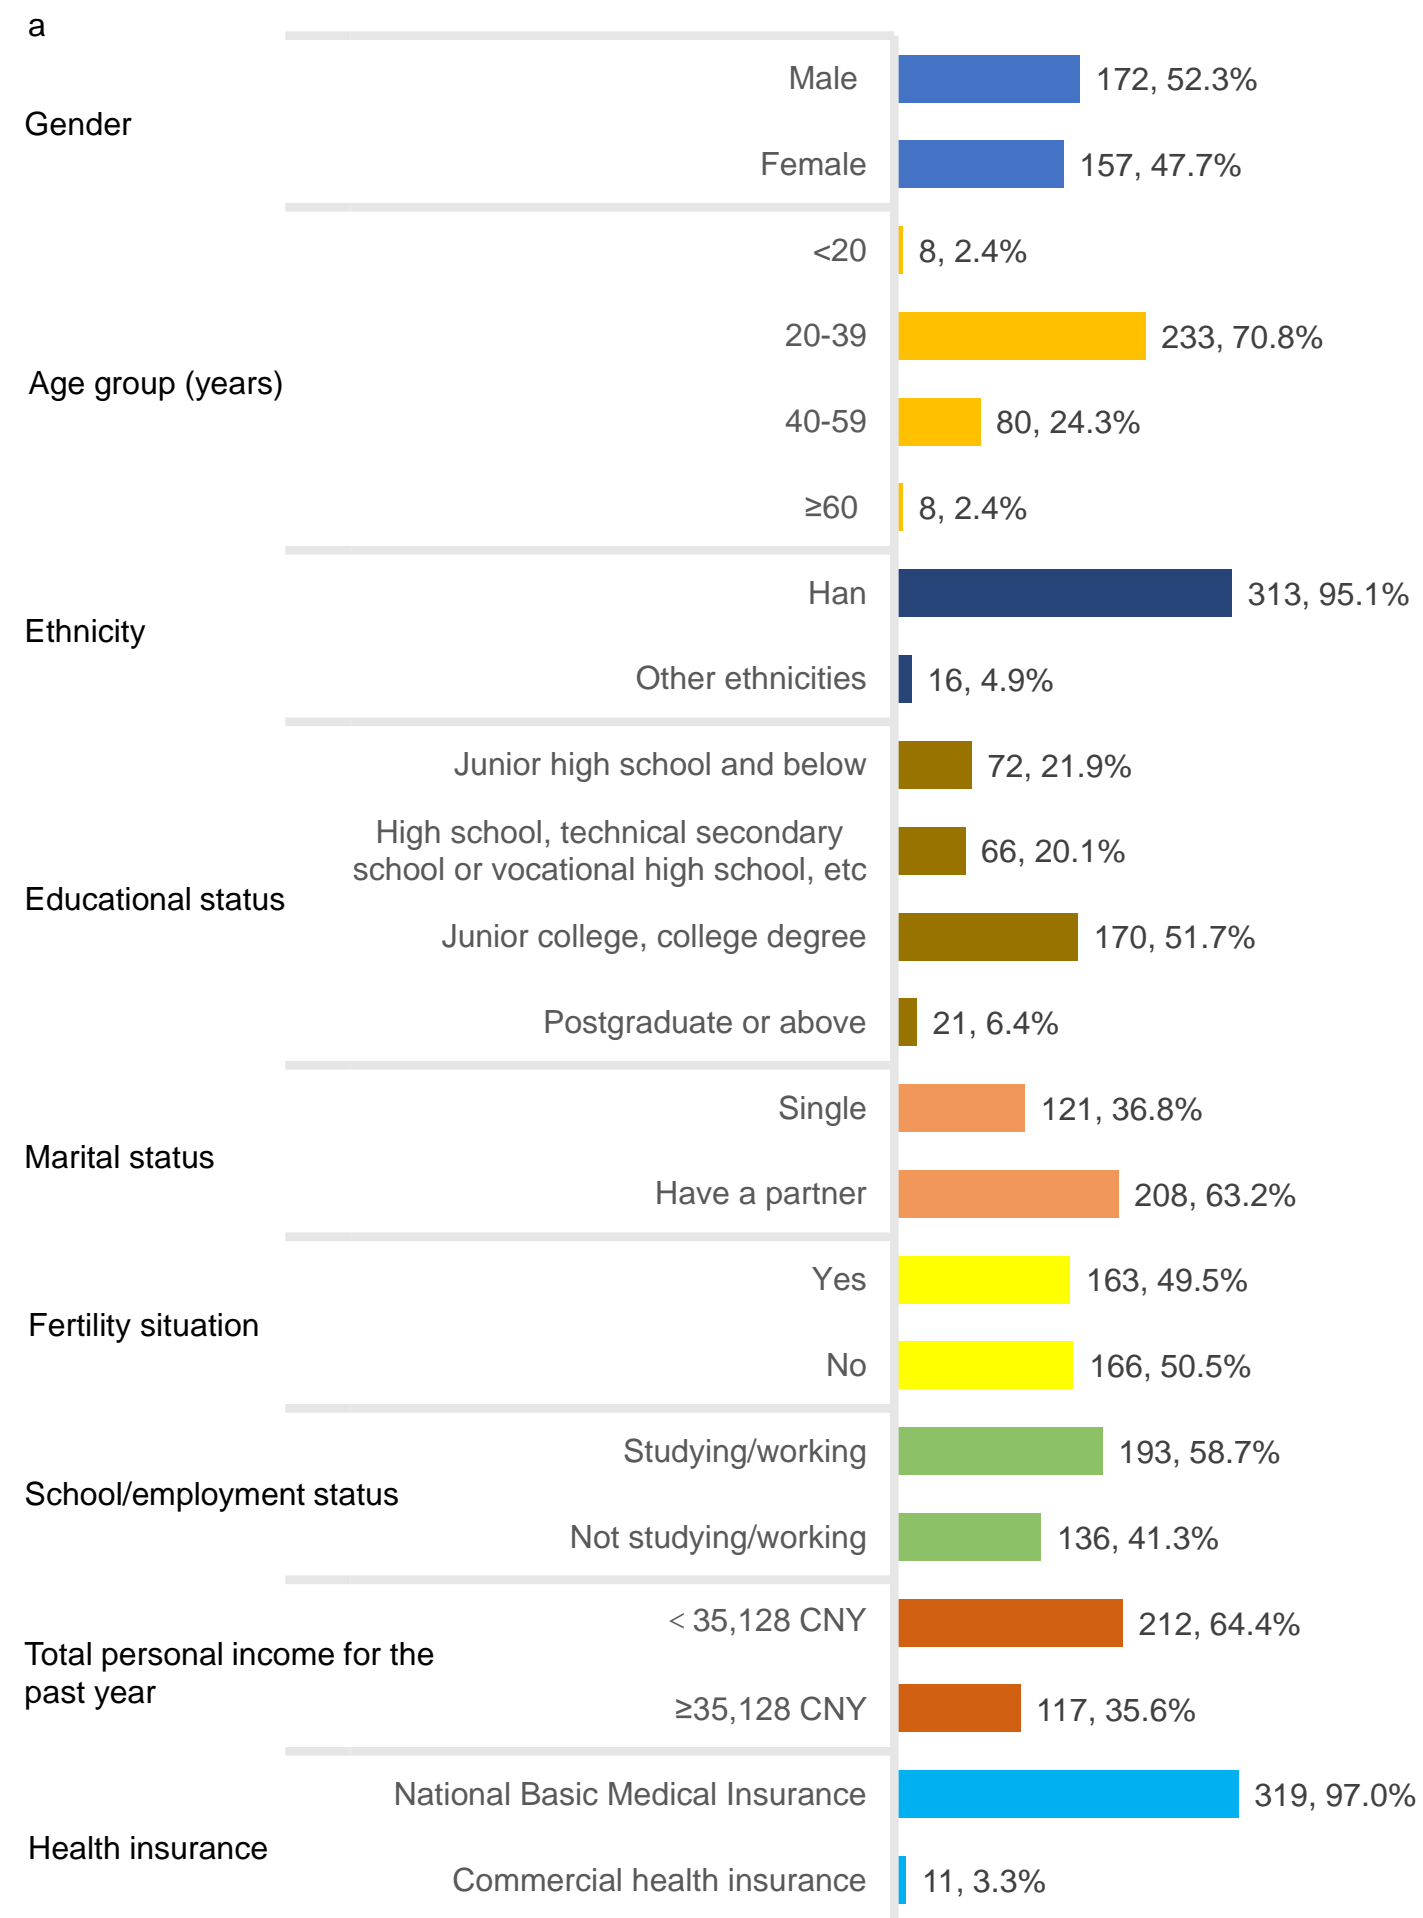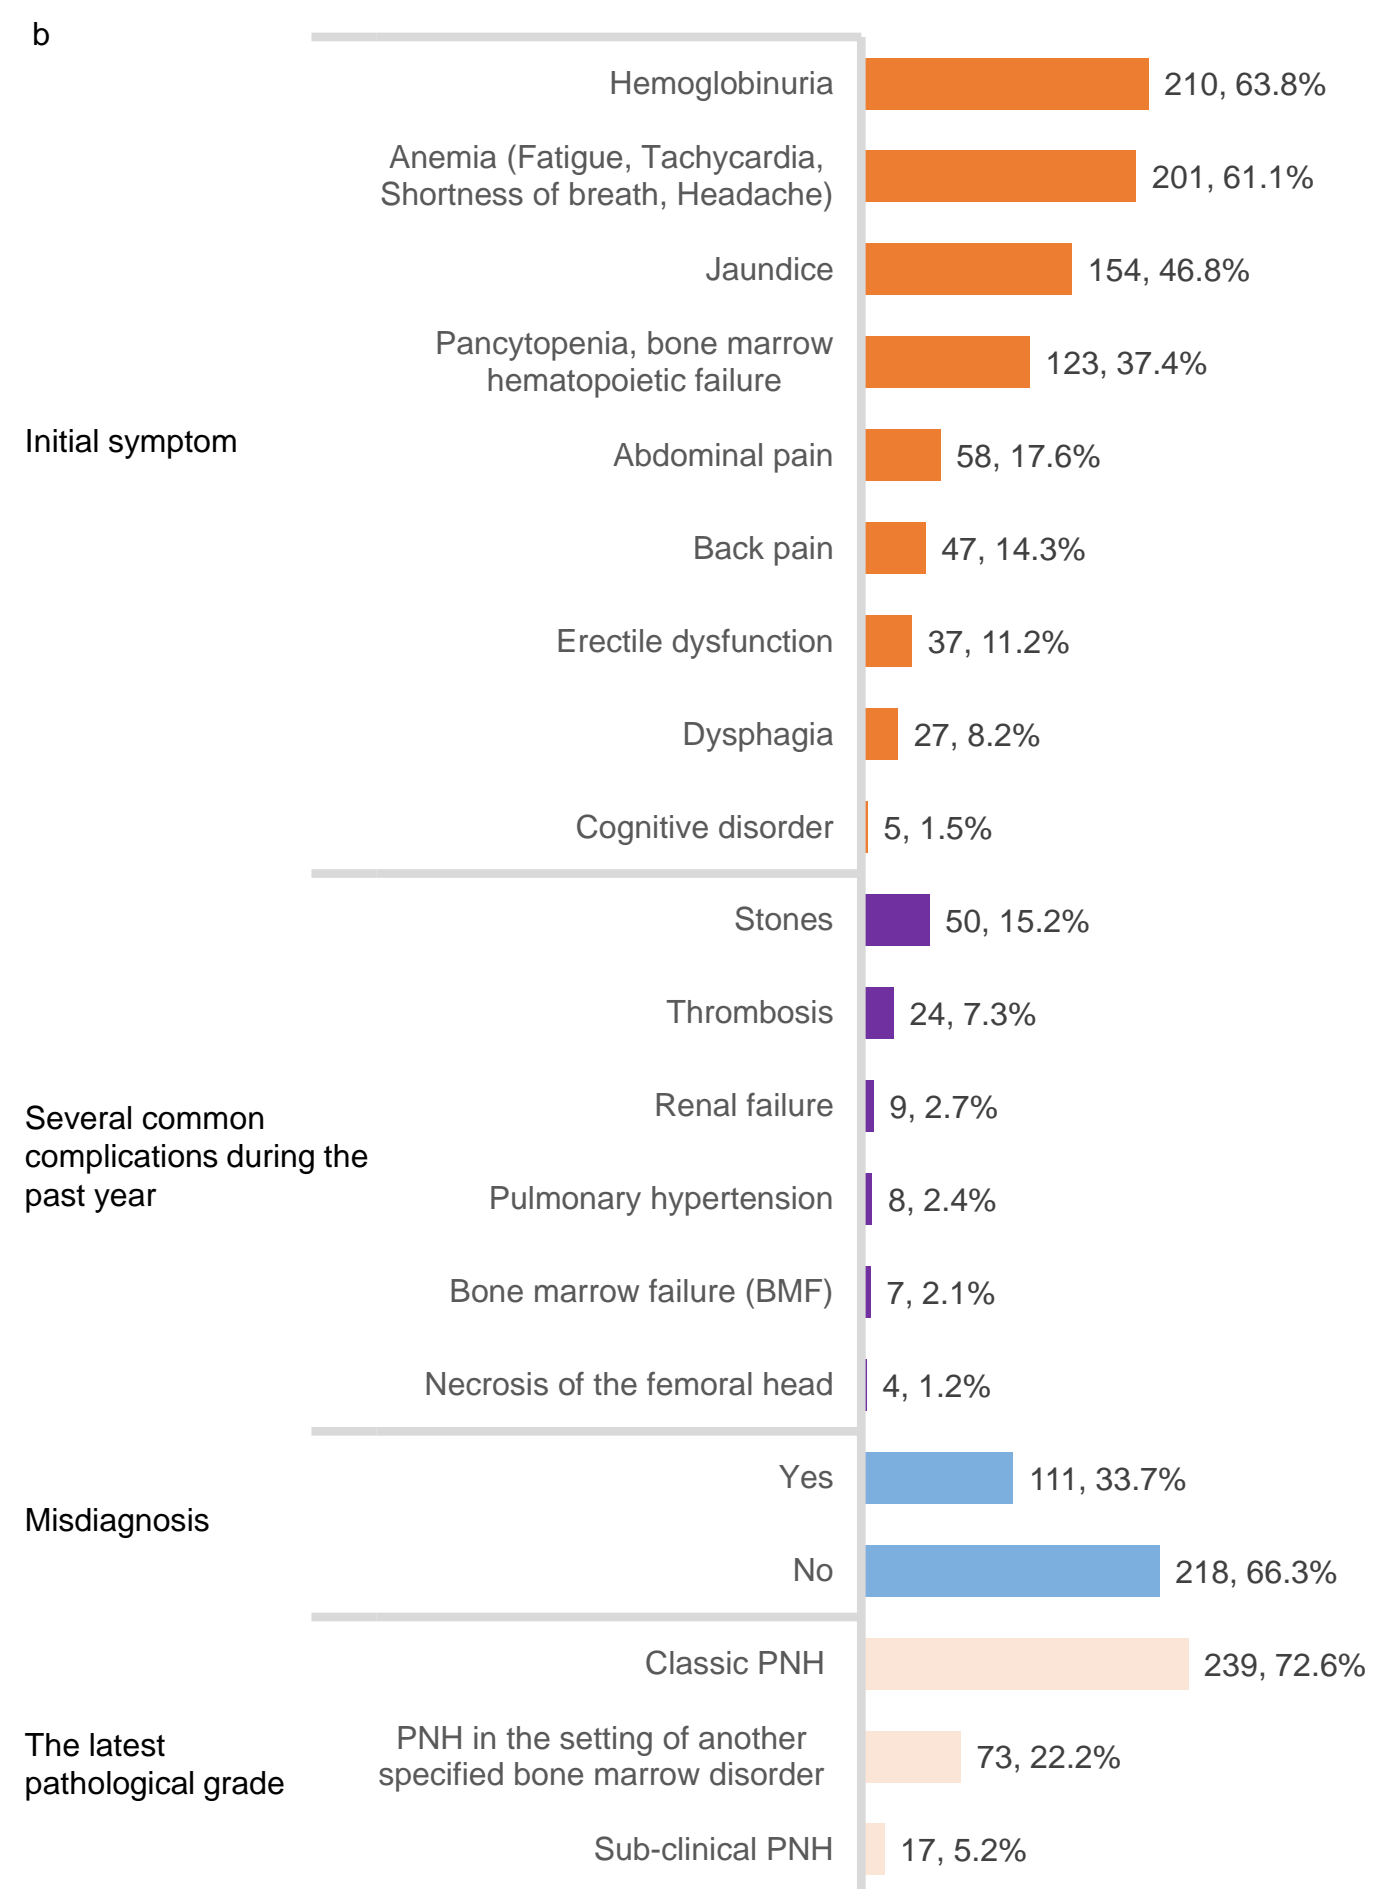

Supplement: 13023_2024_3178_MOESM1_ESM.pdf [file 13023_2024_3178_MOESM1_ESM.pdf]
